# Supplementary material for: Phenotypic Characterization of LEA Rat: A New Rat Model of Nonobese Type 2 Diabetes
Source: Hindawi journal article supplement (doi:10.1155/2013/986462), 2013-01-01
Supplement: f1 [file 986462.f1.pdf]

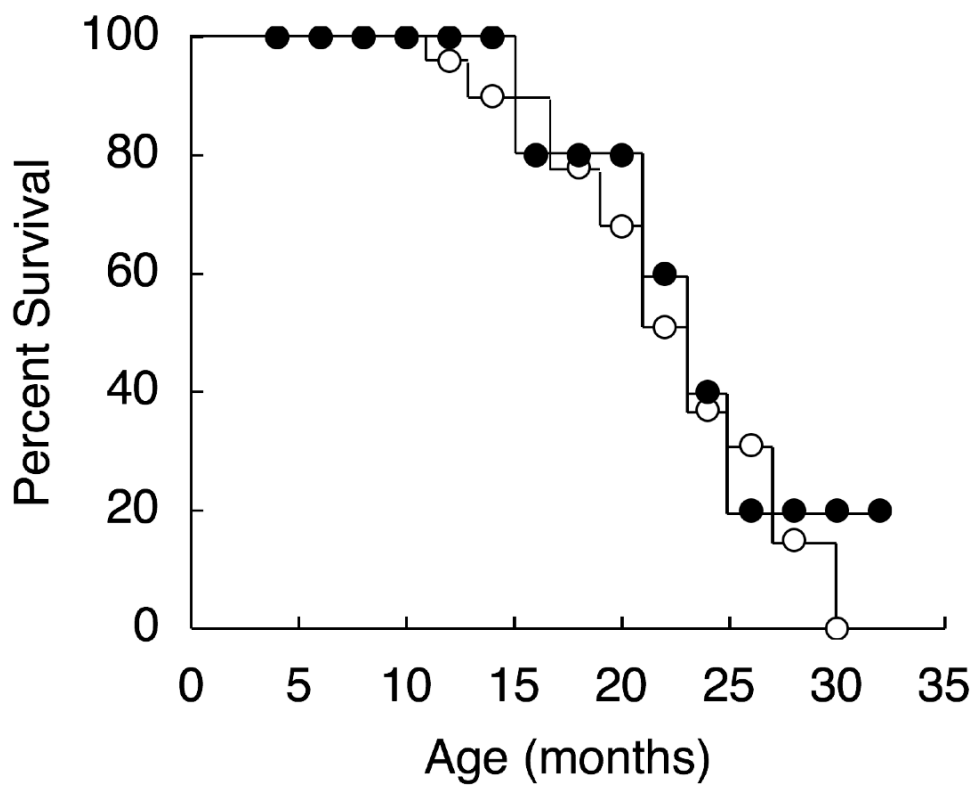

Supplementary Figure 1
